# Supplementary material for: Do Patients with Second Primary Colorectal Cancer Hold the Similar Prognosis and Therapeutic Benefits as Those with Initial Primary Colorectal Cancer?
Source: Hindawi journal article supplement (doi:10.1155/2018/6172670), 2018-08-30
Supplement: f1 [file 6172670.f1.pdf]

## Supplemental Data

**eTable1. Prognostic factors in cox proportional hazard model(Overall survival)**

|                  | Univariate Analysis |             |        | Multivariate Analysis |             |        |
|------------------|---------------------|-------------|--------|-----------------------|-------------|--------|
|                  | HR                  | 95%CI       | p      | HR                    | 95%CI       | P      |
| Group            |                     |             | <0.001 |                       |             | <0.001 |
| Initial pCRC     | 1                   |             |        | 1                     |             |        |
| Second pCRC      | 1.384               | 1.358-1.410 |        | 1.102                 | 1.081-1.123 |        |
| Gender           |                     |             | <0.001 |                       |             | <0.001 |
| Male             | 1                   |             |        | 1                     |             |        |
| Female           | 0.962               | 0.954-0.970 |        | 0.845                 | 0.838-0.852 |        |
| Age at diagnosis |                     |             | <0.001 |                       |             | <0.001 |
| <50              | 1                   |             |        | 1                     |             |        |
| 50-59            | 1.034               | 1.014-1.054 |        | 1.158                 | 1.136-1.180 |        |
| 60-69            | 1.352               | 1.328-1.376 |        | 1.590                 | 1.561-1.618 |        |
| 70-79            | 1.972               | 1.939-2.006 |        | 2.468                 | 2.426-2.512 |        |
| 80-89            | 2.984               | 2.932-3.036 |        | 3.913                 | 3.841-3.986 |        |
| ≥90              | 4.393               | 4.281-4.508 |        | 5.770                 | 5.617-5.928 |        |
| Race             |                     |             | <0.001 |                       |             | <0.001 |
| White            | 1                   |             |        | 1                     |             |        |
| Black            | 1.100               | 1.085-1.115 |        | 1.224                 | 1.207-1.241 |        |
| Other†           | 0.802               | 0.789-0.815 |        | 0.847                 | 0.834-0.861 |        |
| Unknown          | 0.257               | 0.218-0.302 |        | 0.345                 | 0.293-0.406 |        |
| Primary Site     |                     |             | <0.001 |                       |             | <0.001 |
| Right colon      | 1                   |             |        | 1                     |             |        |
| Left colon       | 0.856               | 0.848-0.865 |        | 0.997                 | 0.987-1.007 |        |
| Rectum           | 0.862               | 0.853-0.871 |        | 1.041                 | 1.029-1.054 |        |
| Histology        |                     |             | <0.001 |                       |             | <0.001 |
| AC               | 1                   |             |        | 1                     |             |        |
| MC               | 1.206               | 1.191-1.223 |        | 1.017                 | 1.004-1.031 |        |
| SRCC             | 2.197               | 2.120-2.276 |        | 1.313                 | 1.266-1.361 |        |
| Other            | 2.004               | 1.924-2.087 |        | 1.051                 | 1.009-1.096 |        |
| Grade‡           |                     |             | <0.001 |                       |             | <0.001 |
| Grade I          | 1                   |             |        | 1                     |             |        |
| Grade II         | 1.230               | 1.209-1.251 |        | 1.040                 | 1.022-1.057 |        |
| Grade III        | 1.898               | 1.864-1.934 |        | 1.225                 | 1.202-1.249 |        |
| Grade IV         | 2.070               | 1.996-2.148 |        | 1.340                 | 1.291-1.391 |        |
| Unknown          | 1.807               | 1.767-1.847 |        | 1.093                 | 1.068-1.119 |        |
| pT               |                     |             | <0.001 |                       |             | <0.001 |
| Tis              | 0.469               | 0.449-0.489 |        | 0.589                 | 0.563-0.615 |        |
| T1               | 0.521               | 0.512-0.530 |        | 0.650                 | 0.638-0.662 |        |
| T2               | 0.656               | 0.647-0.666 |        | 0.748                 | 0.737-0.759 |        |
| T3               | 1                   |             |        | 1                     |             |        |

|                |       |             |        |       |             |        |
|----------------|-------|-------------|--------|-------|-------------|--------|
| T4a            | 1.539 | 1.515-1.563 |        | 1.383 | 1.361-1.405 |        |
| T4b            | 2.127 | 2.092-2.163 |        | 1.934 | 1.901-1.967 |        |
| Unknown        | 5.368 | 5.306-5.431 |        | 2.293 | 2.253-2.334 |        |
| pN             |       |             | <0.001 |       |             | <0.001 |
| N0             | 1     |             |        | 1     |             |        |
| N1a            | 1.411 | 1.391-1.431 |        | 1.384 | 1.364-1.405 |        |
| N1b            | 1.782 | 1.759-1.806 |        | 1.677 | 1.654-1.700 |        |
| N2a            | 2.384 | 2.350-2.418 |        | 2.152 | 2.119-2.185 |        |
| N2b            | 3.498 | 3.449-3.548 |        | 3.006 | 2.959-3.054 |        |
| Unknown        | 8.621 | 8.493-8.750 |        | 2.118 | 2.060-2.177 |        |
| pM             |       |             | <0.001 |       |             | <0.001 |
| M0             | 1     |             |        | 1     |             |        |
| M1             | 3.593 | 3.560-3.627 |        | 1.868 | 1.842-1.894 |        |
| Surgery        |       |             | <0.001 |       |             | <0.001 |
| None/Unknown   | 1     |             |        | 1     |             |        |
| Performed      | 0.159 | 0.157-0.162 |        | 0.537 | 0.522-0.552 |        |
| Radiotherapy   |       |             | <0.001 |       |             | <0.001 |
| sequence       |       |             |        |       |             |        |
| None/Unknown   | 1     |             |        | 1     |             |        |
| Before surgery | 0.625 | 0.611-0.639 |        | 1.063 | 1.037-1.090 |        |
| After surgery  | 0.903 | 0.888-0.919 |        | 1.061 | 1.041-1.082 |        |
| Chemotherapy   |       |             | <0.001 |       |             | <0.001 |
| None/Unknown   | 1     |             |        | 1     |             |        |
| Performed      | 1.045 | 1.036-1.054 |        | 0.769 | 0.761-0.777 |        |

**Abbreviation:** AC Adenocarcinoma, MC Mucinous adenocarcinoma, SRCC Signet ring cell carcinoma

† other=American Indian/AK Native, Asian/Pacific Islander, according to SEER

‡ grade I = well differentiated; grade II = moderately differentiated; grade III = poorly differentiated; grade IV = undifferentiated; anaplastic

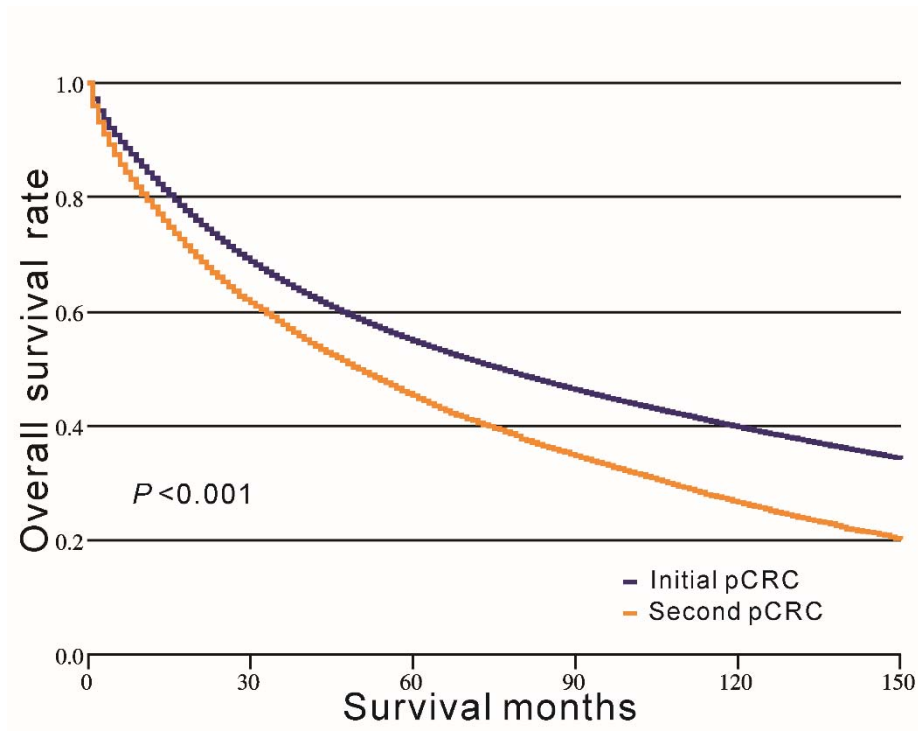

**Figure 1 Kaplan-Meier comparison of overall survival among patients with initial pCRC and second pCRC.**

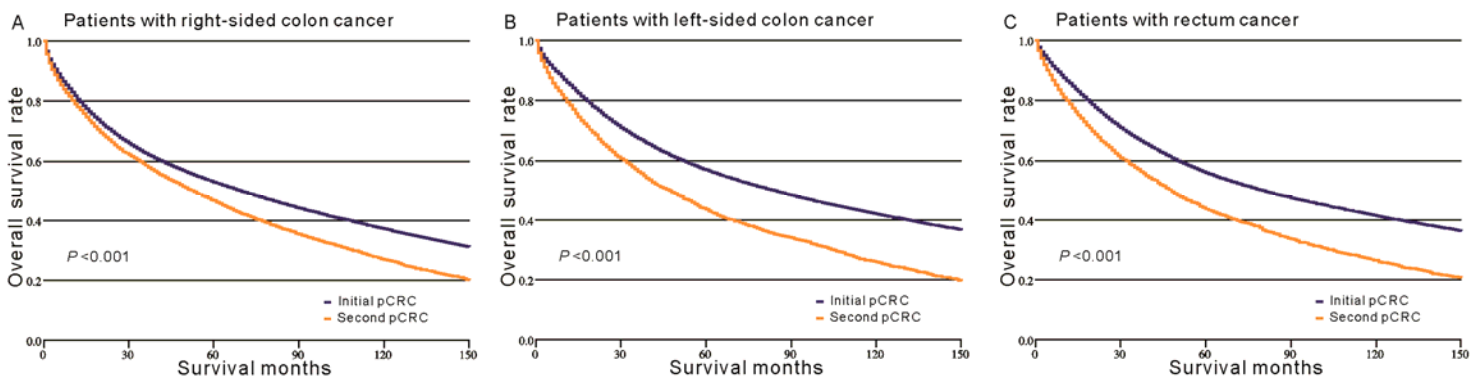

**Figure 2 Kaplan-Meier comparison of overall survival among patients with initial pCRC and second pCRC stratified by primary site.**

(A) Patients with right-sided colon cancer (initial pCRC vs. second pCRC); (B) Patients with left-sided colon cancer (initial pCRC vs. second pCRC); (C) Patients with rectum cancer (initial pCRC vs. second pCRC).

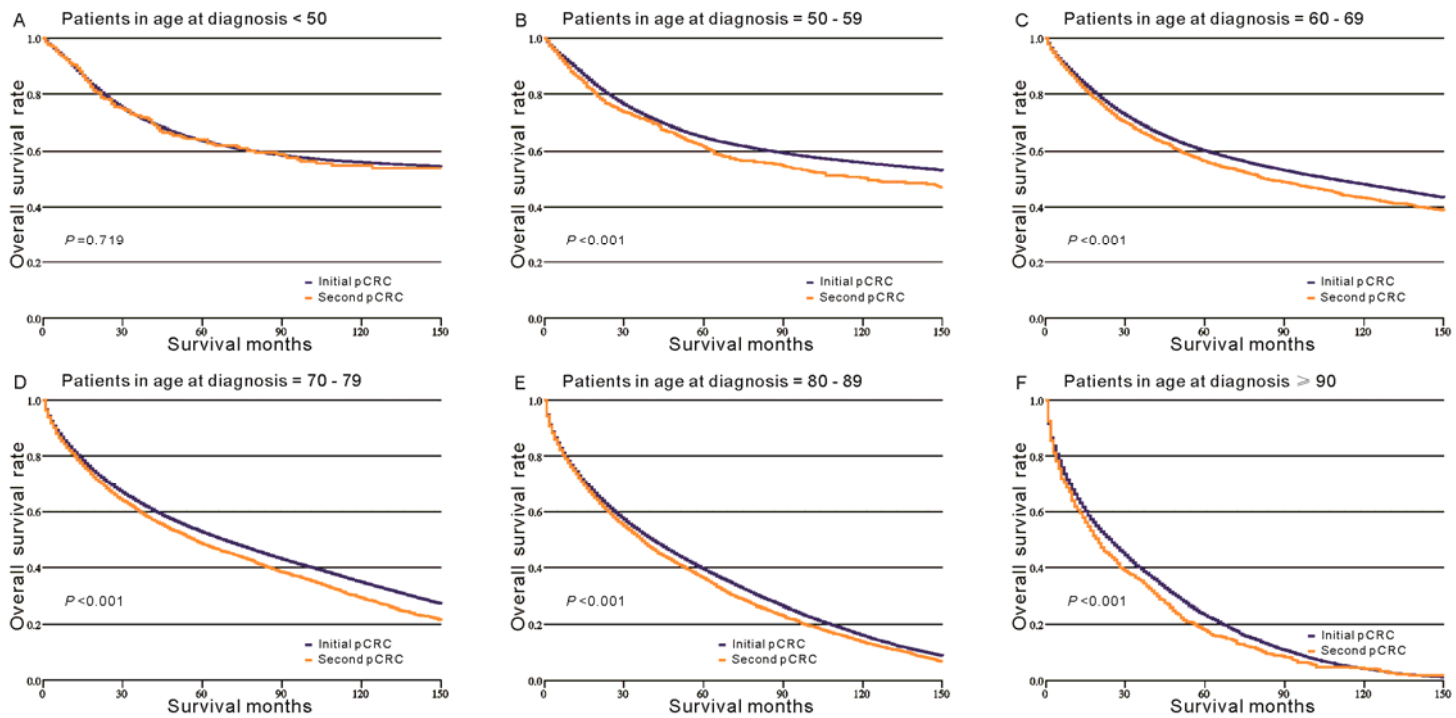

**Figure 3 Kaplan-Meier comparison of overall survival among patients with initial pCRC and second pCRC stratified by age at diagnosis.**

(A) Patients in age at diagnosis > 50 (initial pCRC vs. second pCRC); (B) Patients in age at diagnosis = 50 - 59 (initial pCRC vs. second pCRC); (C) Patients in age at diagnosis = 60 - 69 (initial pCRC vs. second pCRC); (D) Patients in age at diagnosis = 70 - 79 (initial pCRC vs. second pCRC); (E) Patients in age at diagnosis = 80 - 89 (initial pCRC vs. second pCRC); (F) Patients in age at diagnosis ≥ 90 (initial pCRC vs. second pCRC).

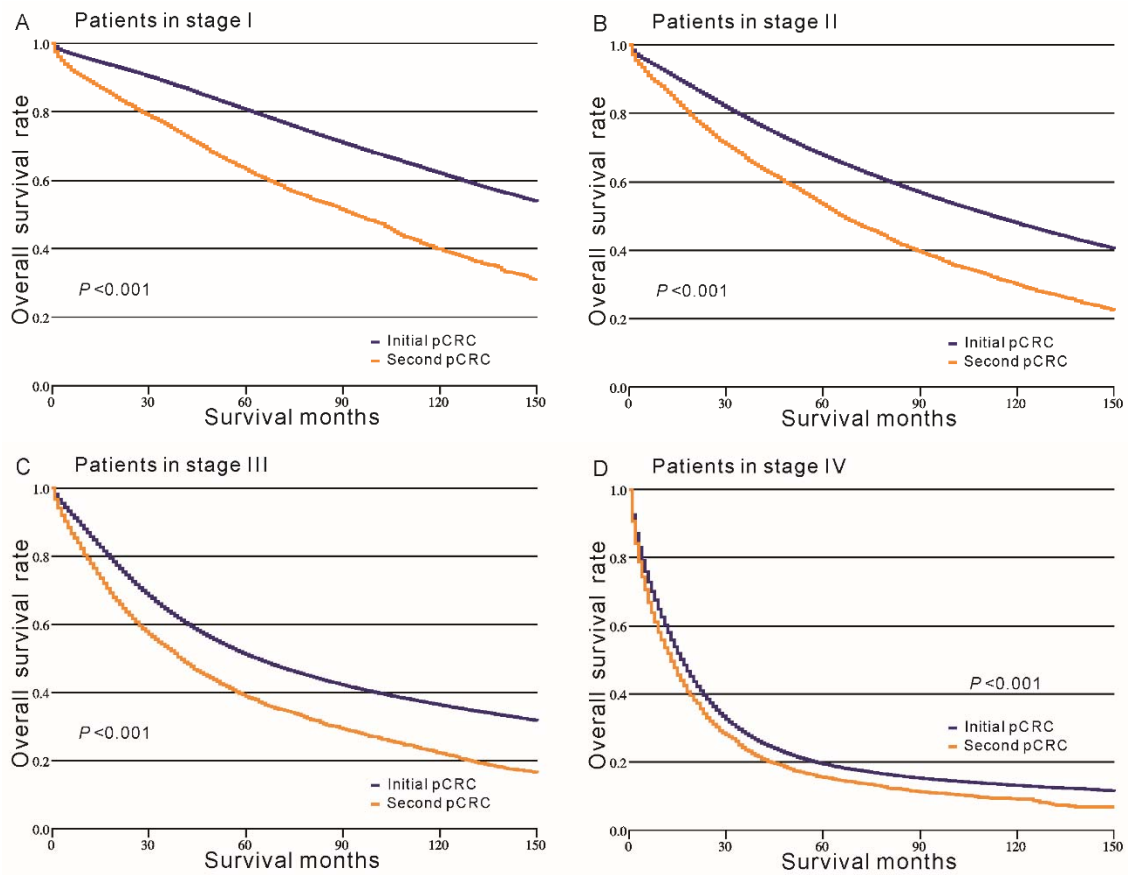

**Figure 4 Kaplan-Meier comparison of overall survival among patients with initial pCRC and second pCRC stratified by pTNM stage.**

(A) Patients in stage I (initial pCRC vs. second pCRC); (B) Patients in stage II (initial pCRC vs. second pCRC); (C) Patients in stage III (initial pCRC vs. second pCRC); (D) Patients in stage IV (initial pCRC vs. second pCRC).

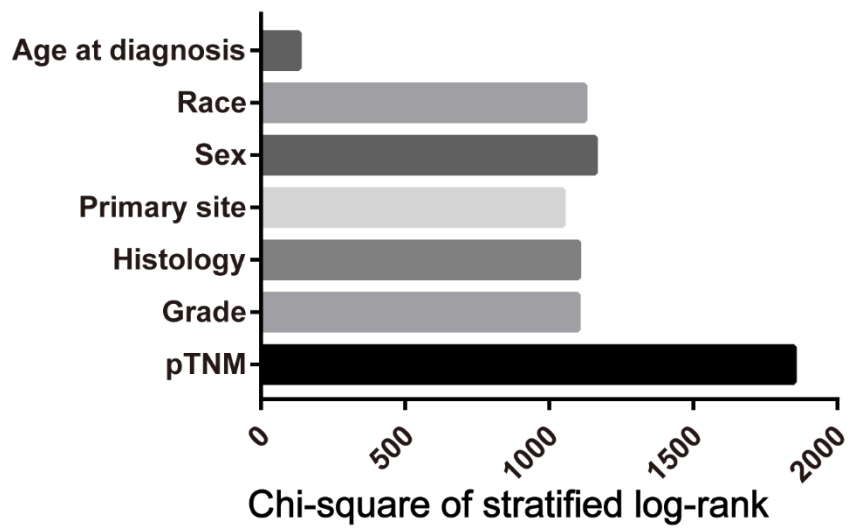

**Figure 5** Chi-square of OS log rank after stratified by pTNM stage, grade, histology, primary site, sex, race and age at diagnosis. The Chi-square for Age at diagnosis was lowest.

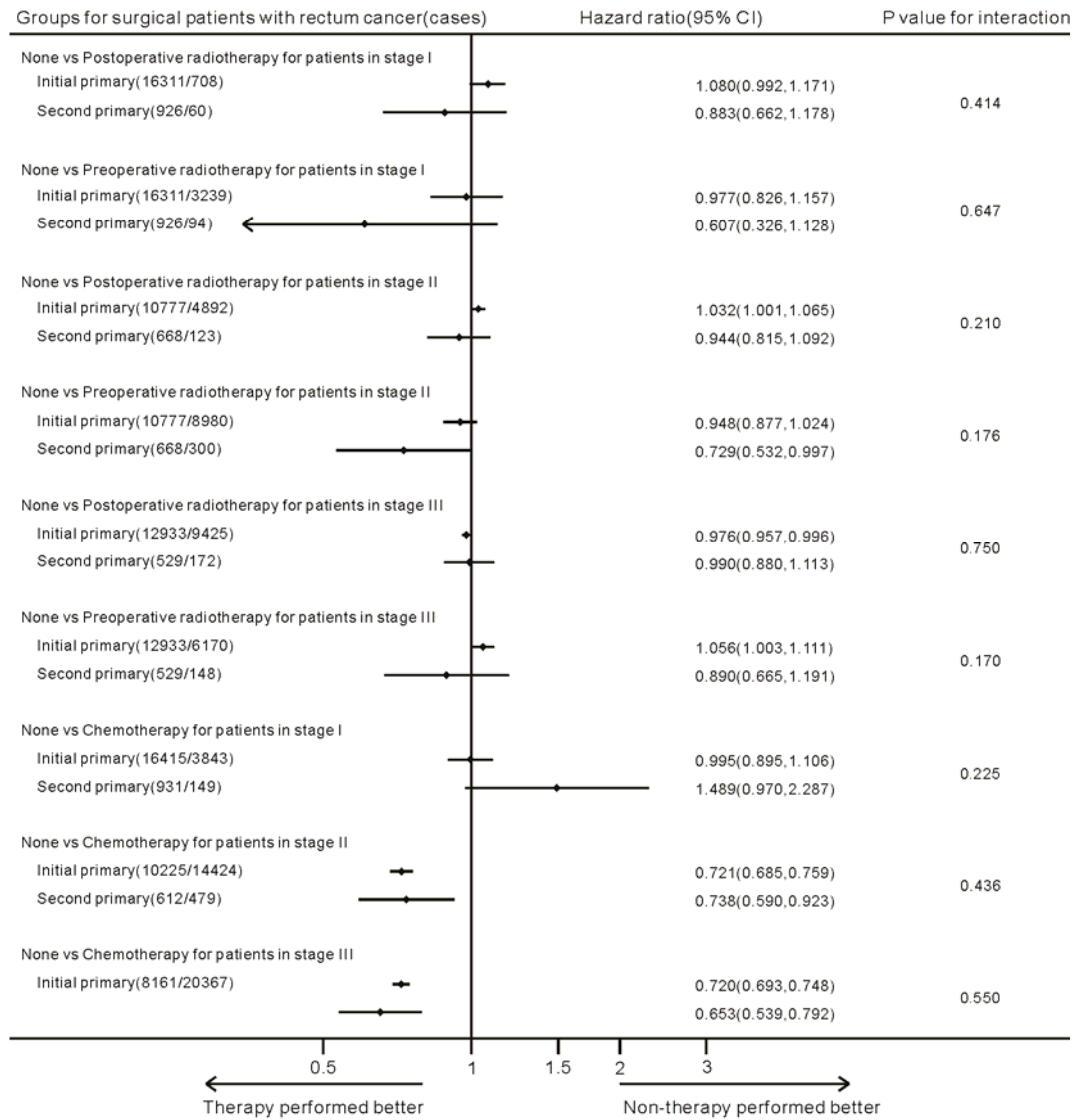

**Figure 6 Forest plot of Hazard ratios (HR) and 95% CI in OS different subgroups (Cox proportional hazards model analysis) and interaction comparison between patients with initial and second primary surgical rectum cancer.**

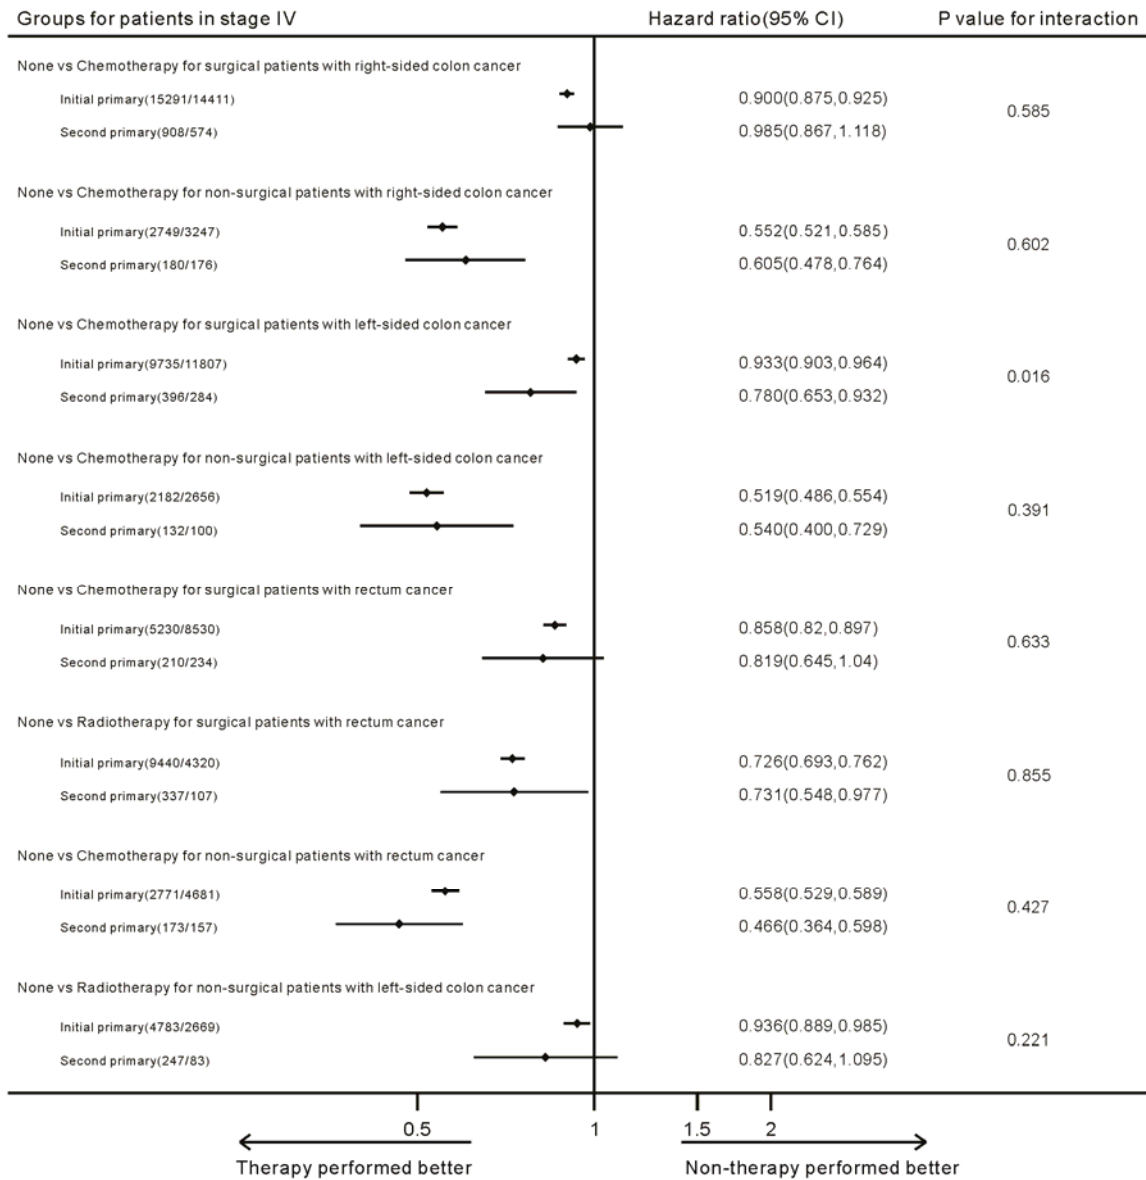

**Figure 7 Forest plot of Hazard ratios (HR) and 95% CI in OS different subgroups (Cox proportional hazards model analysis) and interaction comparison between patients in stage IV with initial and second primary CRC.**



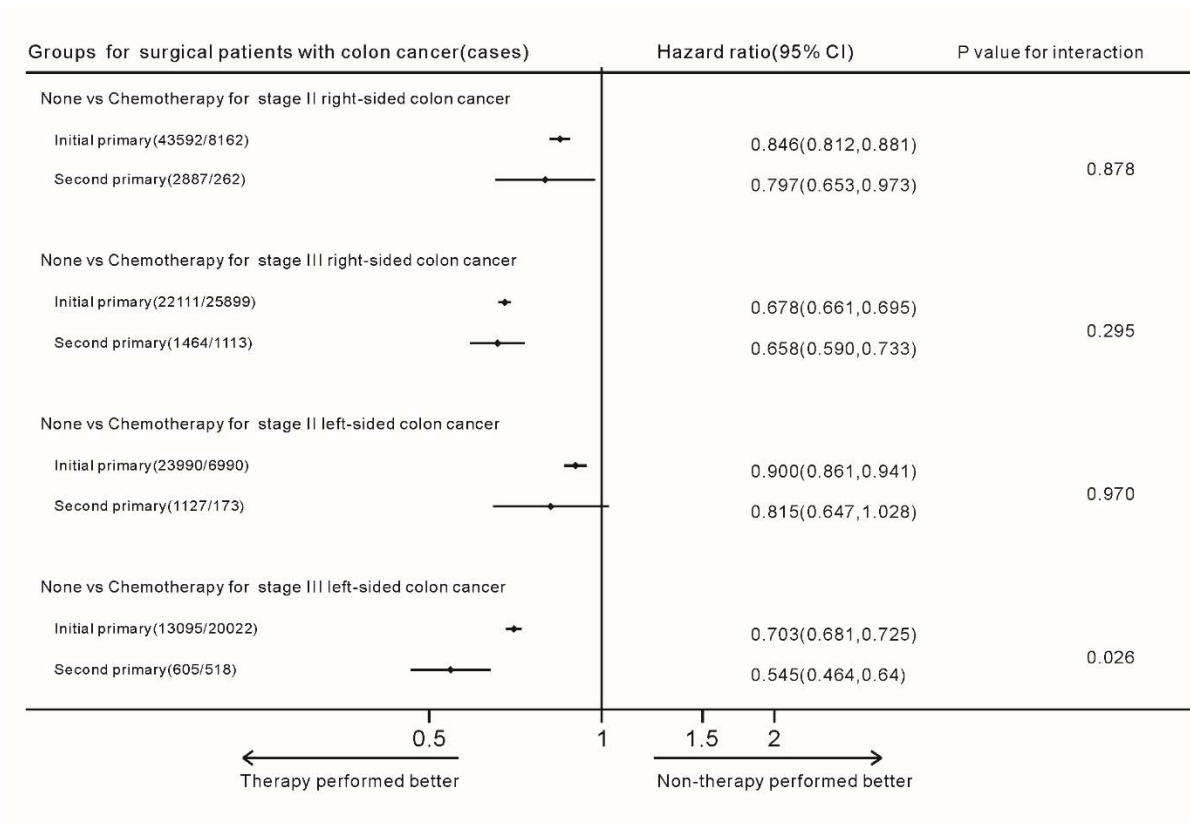

**Figure 8 Forest plot of Hazard ratios (HR) and 95% CI in OS different subgroups (Cox proportional hazards model analysis) and interaction comparison between patients with initial and second primary surgical colon cancer.**
